# Supplementary material
Source: PubMed Central journal article supplement (PMC3910989)

**Supplementary Table S1.** Genomes of *Bifidobacterium* strains available in the GenBank database (<http://www.ncbi.nih.gov/genbank>) used for the *in silico* analysis of *eps* clusters. Strains marked with an asterisk were selected to represent physical maps of their *eps* clusters.

| Species                                   | Strain          | Genome<br>Accession No. | <i>eps</i> cluster       |           |                     | G+C content (%) |            | Priming-GTF <sup>c</sup> |                 | Reference       |
|-------------------------------------------|-----------------|-------------------------|--------------------------|-----------|---------------------|-----------------|------------|--------------------------|-----------------|-----------------|
|                                           |                 |                         | Length (bp) <sup>a</sup> | No. genes | No. ME <sup>b</sup> | Genome          | <i>eps</i> | <i>cpsD</i>              | <i>rfbP</i>     |                 |
| <i>B. adolescentis</i>                    | ATCC15703*      | AP009256                | 19,467                   | 17        | 0                   | 59.2            | 55.3       | BAD_1389                 | -               | DS <sup>d</sup> |
| <i>B. animalis</i> subsp. <i>lactis</i>   | DSM10140*       | CP001606                | 54,249                   | 42        | 1                   | 60.5            | 53.5       | Balat_1392               | Balat_1371      | (1)             |
|                                           | B1-04           | CP001515                | 54,249                   | 42        | 1                   | 60.5            | 53.5       | Balac_1392               | Balac_1371      | (1)             |
|                                           | AD011           | CP001213                | 54,248                   | 34        | 1                   | 60.5            | 53.5       | BLA_0595                 | BLA_0576        | (2)             |
|                                           | BB-12           | CP001853                | 54,215                   | 41        | 1                   | 60.5            | 53.5       | BIF_00944                | BIF_00983       | (3)             |
|                                           | V9              | CP001892                | 54,249                   | 42        | 1                   | 60.5            | 53.5       | BalV_1349                | BalV_1328       | (4)             |
|                                           | BLC1            | CP003039                | 54,250                   | 41        | 1                   | 60.5            | 53.5       | BLC1_1349                | BLC1_1328       | (5)             |
|                                           | CNCM I-2494     | CP002915                | 54,236                   | 41        | 1                   | 60.5            | 53.5       | BALAC2494_01344          | BALAC2494_01362 | (6)             |
|                                           | Bi-07           | CP003498                | 54,249                   | 36        | 1                   | 60.5            | 53.5       | W91_1429                 | W91_1409        | (7)             |
|                                           | B420            | CP003497                | 54,248                   | 37        | 1                   | 60.5            | 53.5       | W7Y_1394                 | W7Y_1374        | (7)             |
| <i>B. animalis</i> subsp. <i>animalis</i> | ATCC25527*      | CP002567                | 54,307                   | 32        | 8                   | 60.5            | 56.1       | BANAN_06765              | -               | (8)             |
| <i>B. asteroides</i>                      | PRL2011*        | CP003325                | 13,454                   | 12        | 0                   | 60.1            | 49.1       | -                        | BAST_1667       | (9)             |
| <i>B. bifidum</i>                         | PRL2010         | CP001840                | -                        | -         | -                   | 62.7            | -          | -                        | -               | (10)            |
|                                           | S17             | CP002220                | 1,116                    | 1         | -                   | 62.8            | -          | -                        | BBIF_0393       | (11)            |
|                                           | BGN4            | CP001361                | -                        | -         | -                   | 62.4            | -          | -                        | -               | (12)            |
| <i>B. breve</i>                           | ACS-071-V-Sch8b | CP002743                | 15,174                   | 10        | 1                   | 58.7            | 51.5       | -                        | HMPREF9228_0447 | DS              |
|                                           | UCC2003*        | CP000303                | 31,430                   | 20        | 6                   | 58.7            | 52.5       | -                        | Bbr_0430        | (13)            |
| <i>B. dentium</i>                         | Bd1*            | CP001750                | 58,993                   | 49        | 0                   | 58.5            | 52.0       | -                        | BDP_1857        | (14)            |
| <i>B. longum</i> subsp. <i>infantis</i>   | ATCC15697*      | CP001095                | 19,310                   | 13        | 5                   | 59.9            | 51.4       | -                        | Blon_2114       | (15)            |
|                                           | 157F            | AP010890                | 1,719                    | 1         | -                   | 60.1            | 57.7       | -                        | BLIF_0362       | (16)            |
| <i>B. longum</i> subsp. <i>longum</i>     | NCC2705*        | AE014295                | 34,379                   | 15        | 6                   | 60.1            | 55.4       | BL0237                   | BL0249          | (17)            |

|                        |            |          |        |    |   |      |      |             |              |      |
|------------------------|------------|----------|--------|----|---|------|------|-------------|--------------|------|
|                        | DJ010A     | CP000605 | -      | -  | - | 60.1 | -    | -           | -            | (18) |
|                        | F8         | FP929034 | 17,580 | 10 | 3 | 59.9 | 50.8 | -           | BIL_15040    | DS   |
|                        | JDM301     | CP002010 | -      | -  | - | 59.8 | -    | -           | -            | (19) |
|                        | JCM 1217   | AP010888 | 10,265 | 6  | 1 | 60.3 | 56.3 | BLLJ_0364   | -            | (16) |
|                        | KACC 91563 | CP002794 | 20,193 | 14 | 4 | 59.8 | 50.7 | -           | BLNIAS_02272 | (20) |
|                        | BBMN68     | CP002286 | 14,316 | 11 | 0 | 59.9 | 45.9 | BBMN68_1012 | -            | (21) |
| <i>B. thermophilum</i> | RBL67*     | CP004346 | 27,116 | 20 | 3 | 60.1 | 52.9 | -           | D805_0348    | DS   |

<sup>a</sup> The hyphen (-) indicates the absence of the *priming-GTF* and therefore the absence of *eps*-cluster

<sup>b</sup> ME, Mobile Elements (transposase)

<sup>c</sup> Location of the priming-glycosyltransferase in the corresponding bifidobacterial genome

<sup>d</sup> DS, Direct Submission

## List of references

1. **Barrangou R, Briczinski EP, Traeger LL, Loquasto JR, Richards M, Horvath P, Coûté-Monvoisin AC, Leyer G, Rendulic S, Steele JL, Broadbent JR, Oberg T, Dudley EG, Schuster S, Romero DA, Roberts RF.** 2009. Comparison of the complete genome sequences of *Bifidobacterium animalis* subsp. *lactis* DSM10140 and BI-04. *J Bacteriol* **191**:4144-4151.
2. **Kim JF, Jeong H, Yu DS, Choi SH, Hur CG, Park MS, Yoon SH, Kim DW, Ji GE, Park HS, Oh TK.** 2009. Genome sequence of the probiotic bacterium *Bifidobacterium animalis* subsp. *lactis* AD011. *J Bacteriol* **191**:678-379.
3. **Garrigues C, Johansen E, Pedersen MB.** 2010. Complete genome sequence of *Bifidobacterium animalis* subsp. *lactis* Bb12, a widely consumed probiotic strain. *J Bacteriol* **192**:2467-2468.
4. **Sun Z, Chen X, Wang J, Gao P, Zhou Z, Ren Y, Sun T, Wang L, Meng H, Chen W, Zhang H.** 2010. Complete genome sequence of probiotic *Bifidobacterium animalis* subsp. *lactis* V9. *J Bacteriol* **192**:4080-4081.
5. **Bottacini F, Dal Bello F, Turroni F, Milani C, Duranti S, Foroni E, Viappiani A, Strati F, Mora D, van Sinderen D, Ventura M.** 2011. Complete genome sequence of *Bifidobacterium animalis* subsp. *lactis* BLC1. *J Bacteriol* **193**:6387-6388.
6. **Chervaux C, Grimaldi C, Bolotin A, Quinquis B, Legrain-Raspaud S, van Hylckama-Vlieg JE, Denariáz G, Smokvina T.** 2011. Genome sequence of the probiotic strain *Bifidobacterium animalis* subsp. *lactis* CNCM I-2494. *J Bacteriol* **193**:5560-5561.
7. **Stahl B, Barrangou R.** 2012. Complete genome sequences of probiotic strains *Bifidobacterium animalis* subsp. *lactis* B420 and Bi-07. *J Bacteriol* **194**:4131-4132.
8. **Loquasto JR, Barrangou R, Dudley EG, Roberts RF.** 2011. Short communication: the complete genome sequence of *Bifidobacterium animalis* subspecies *animalis* ATCC 25527(T) and comparative analysis of growth in milk with *B. animalis* subspecies *lactis* DSM 10140(T). *J Dairy Sci* **94**:5864-70.
9. **Bottacini F, Milani C, Turroni F, Sánchez B, Foroni E, Duranti S, Serafini F, Viappiani A, Strati F, Ferrarini A, Delledonne M, Henrissat B, Coutinho P, Fitzgerald GF, Margolles A, van Sinderen D, Ventura M.** 2012. *Bifidobacterium asteroides* PRL2011 genome analysis reveals clues for colonization of the insect gut. *PLoS ONE* **7**:e44229.
10. **Turroni F, Bottacini F, Foroni E, Mulder I, Kim JH, Zomer A, Sánchez B, Bidossi A, Ferrarini A, Giubellini V, Delledonne M, Henrissat B, Coutinho P, Oggioni M, Fitzgerald GF, Mills D, Margolles A, Kelly D, van Sinderen D, Ventura M.** 2010. Genome analysis of *Bifidobacterium bifidum* PRL2010 reveals metabolic pathways for host-derived glycan foraging. *Proc. Natl. Acad. Sci. USA* **107**:19514-19519.
11. **Zhurina D, Zomer A, Gleinser M, Brancaccio VF, Auchter M, Waidmann MS, Westermann C, van Sinderen D, Riedel CU.** 2011. Complete genome sequence of *Bifidobacterium bifidum* S17. *J Bacteriol* **193**:301-302.
12. **Yu DS, Jeong H, Lee DH, Kwon SK, Song JY, Kim BK, Park MS, Ji GE, Oh TK, Kim JF.** 2012. Complete genome sequence of the probiotic bacterium *Bifidobacterium bifidum* strain BGN4. *J Bacteriol* **194**:4757-4758.
13. **Motherway MO, Zomer A, Leahy SC, Reunanen J, Bottacini F, Claesson MJ, O'Brien F, Flynn K, Casey PG, Munoz JAM, Kearney B, Houston AM, O'Mahont C, Higgins DG, Shanahan F, Palva A, de Vos WM, Fitzgerald GF,**

- Ventura M, O'Toole PW, van Sinderen D.** 2011. Functional genome analysis of *Bifidobacterium breve* UCC2003 reveals type IVb tight adherence (Tad) pili as an essential and conserved host colonization factor. Proc. Natl. Acad. Sci. USA **108**:11217-11222.
14. **Ventura M, Turrone F, Zomer A, Foroni E, Giubellini V, Bottacini F, Canchaya C, Claesson MJ, He F, Mantzourani M, Mulas L, Ferrarini A, Gao B, Delle Donne M, Henrissat B, Coutinho P, Oggioni M, Gupta RS, Zhang Z, Beighton D, Fitzgerald GF, O'Toole PW, van Sinderen D.** 2009. The *Bifidobacterium dentium* Bd1 genome sequence reflects its genetic adaptation to the human oral cavity. PLoS Genet **5**:e1000785.
  15. **Sela DA, Champman J, Adeuya A; Kim JH, Chen F, Whitehead TR, Lapidus A, Rokhsar DS, Lebrilla CB, German JB, Price NP, Richardson PM, Mills DA.** 2008. The genome sequence of *Bifidobacterium longum* subsp. *infantis* reveals adaptations for milk utilization within the infant microbiome. Proc. Natl. Acad. Sci. USA **105**:18964-18969.
  16. **Fukuda S, Toh H, Hase K, Oshima K, Nakanishi Y, Yoshimura K, Tobe T, Clarke JM, Topping DL, Suzuki T, Taylor TD, Itoh K, Kikuchi J, Morita H, Hattori M, Ohno H.** 2011. Bifidobacteria can protect from enteropathogenic infection through production of acetate. Nature **469**:543-547.
  17. **Schell MA, Karmirantzou M, Snel B, Vilanova D, Berger B, Pessi G, Zwahlen MC, Desiere F, Bork P, Delley M, Pridmore D, Arigoni F.** 2002. The genome sequence of *Bifidobacterium longum* reflects its adaptation to the human gastrointestinal tract. Proc. Natl. Acad. Sci. USA. **99**:14422-14427.
  18. **Lee JH, Karamychev VN, Kozyavkin SA, Mills D, Pavlov AR, Pavlova NV, Polouchine NN, Richardson PM, Shakahova VV, Slesarev AI, Weimer B, O'Sullivan DJ.** 2008. Comparative genomic analysis of the gut bacterium *Bifidobacterium longum* reveals loci susceptible to deletion during pure culture growth. BMC Genomics **9**:247.
  19. **Wei YX, Zhang ZY, Liu C, Zhu YZ, Zhu YQ, Zheng H, Zhao GP, Wang S, Guo XK.** 2011. Complete genome sequence of *Bifidobacterium longum* JDM301. J Bacteriol **192**:4076-4077.
  20. **Ham JS, Lee T, Byun MJ, Lee KT, Lim MK, Han GS, Jeong SG, Oh MH, Kim DH, Kim H.** 2011. Complete genome sequence of *Bifidobacterium longum* subsp. *longum* KACC91563. J Bacteriol **193**:5044.
  21. **Hao Y, Huang D, Guo H, Xiao M, An H, Zhao L, Zuo F, Zhang B, Hu S, Song S, Chen S, Ren F.** 2011. Complete genome sequence of *Bifidobacterium longum* subsp. *longum* BBMN68, a new strain from a healthy chinese centenarian. J Bacteriol **193**:787-788.

**Supplementary Fig. S1.** Physical maps of the putative exopolysaccharide (*eps*)-gene clusters from five *Bifidobacterium longum* subsp. *longum* strains. The genes were categorised according to their potential function as indicated in box-legend.

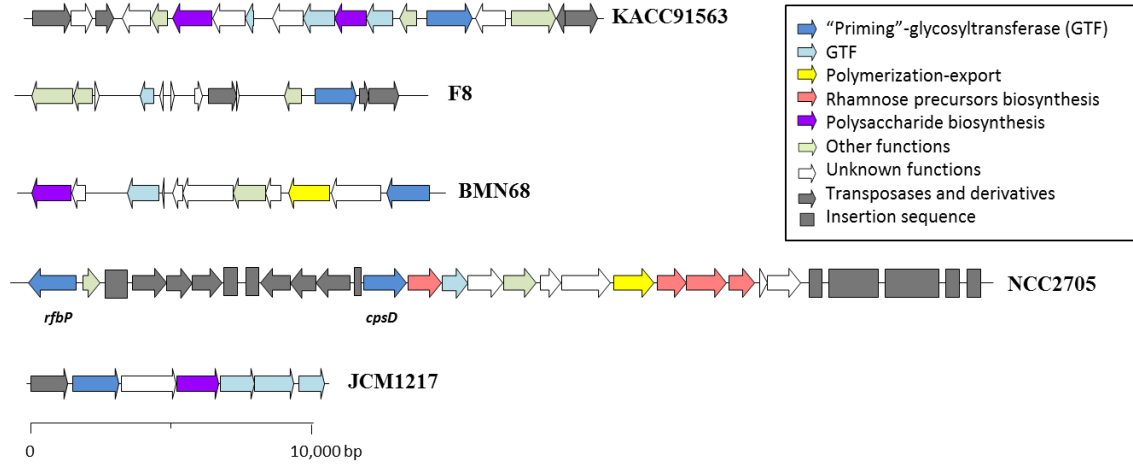

Supplement: AEM.02977-13_zam999104981so1.pdf [file AEM.02977-13_zam999104981so1.pdf]
